# Supplementary material for: Controlled Synthesis and Visible-Light-Driven Photocatalytic Activity of BiOBr Particles for Ultrafast Degradation of Pollutants
Source: MDPI journal article supplement (doi:10.3390/molecules28145558), 2023-07-20
Supplement: s1 [file s1]

# Controlled Synthesis and Visible-Light-Driven Photocatalytic Activity of BiOBr Particles for Ultrafast Degradation of Pollutants

Xiaohui Ji <sup>1,2</sup>, Chen Li <sup>1,2</sup>, Junhai Liu <sup>1,2</sup>, Tianlei Zhang <sup>1,2</sup>, Yue Yang <sup>3</sup>, Ruijin Yu <sup>3</sup> and Xuegang Luo <sup>1,4,\*</sup>

- <sup>1</sup> School of Environment and Resource, Southwest University of Science and Technology, Mianyang 621010, China; snut\_xiaohuiji@163.com (X.J.); leechen\_317@126.com (C.L.); iamliujunhai@126.com (J.L.); ztianlei88@163.com (T.Z.)  
<sup>2</sup> Shaanxi Province Key Laboratory of Catalysis, School of Chemistry and Environmental Science, Shaanxi University of Technology, Hanzhong 723001, China  
<sup>3</sup> College of Chemistry & Pharmacy, Northwest A&F University, Yangling 712100, China; rrysdyx@163.com (Y.Y.); yuruijin@nwsuaf.edu.cn (R.Y.)  
<sup>4</sup> School of Life Science and Engineering, Southwest University of Science and Technology, Mianyang 621010, China  
\* Correspondence: lxg@swust.edu.cn

**Table S1.** Specific surface area of BiOBr particles synthesized by different reaction conditions.

| Preparation condition       | Surface area (m <sup>2</sup> /g) |
|-----------------------------|----------------------------------|
| EG                          | 5.265                            |
| EG : EtOH = 2:1             | 8.021                            |
| EG : EtOH = 1:1             | 7.387                            |
| EG : EtOH = 1:2             | 10.048                           |
| EG : H <sub>2</sub> O = 2:1 | 14.011                           |
| EG : H <sub>2</sub> O = 1:1 | 14.611                           |
| EG : H <sub>2</sub> O = 1:2 | 7.534                            |
| H <sub>2</sub> O            | 5.844                            |

**Table S2.** Specific surface area of BiOBr particles synthesized by different sintering temperatures.

| Sintering temperature | Surface area (m <sup>2</sup> /g) |
|-----------------------|----------------------------------|
| 303 K                 | 14.611                           |
| 473 K                 | 10.081                           |

|       |        |
|-------|--------|
| 573 K | 11.607 |
| 673 K | 11.735 |
| 773 K | 5.132  |

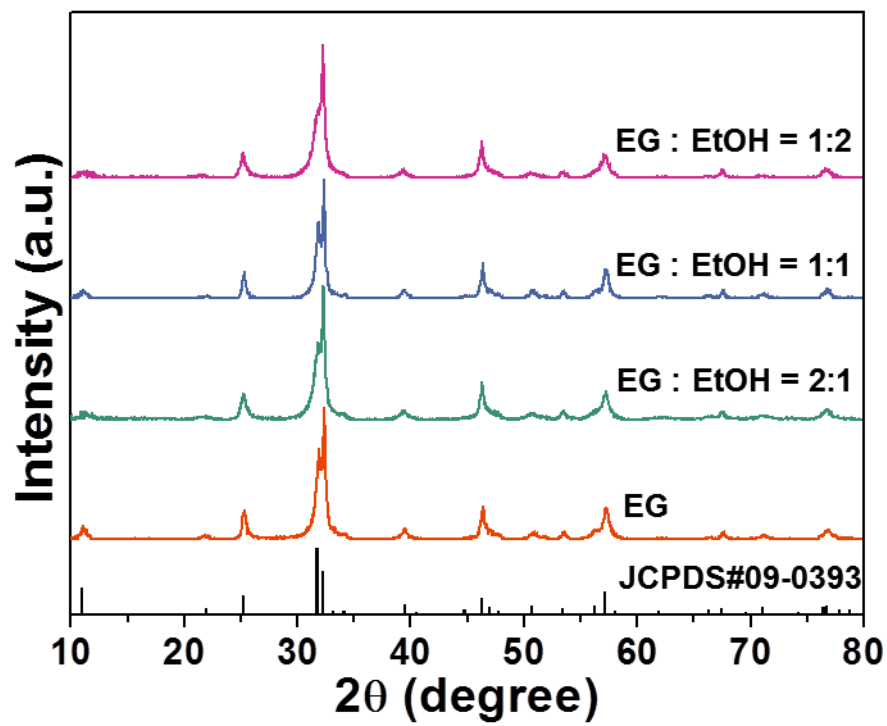

**Figure S1.** XRD patterns of BiOBr particles synthesized by using different ratios of EG and EtOH.

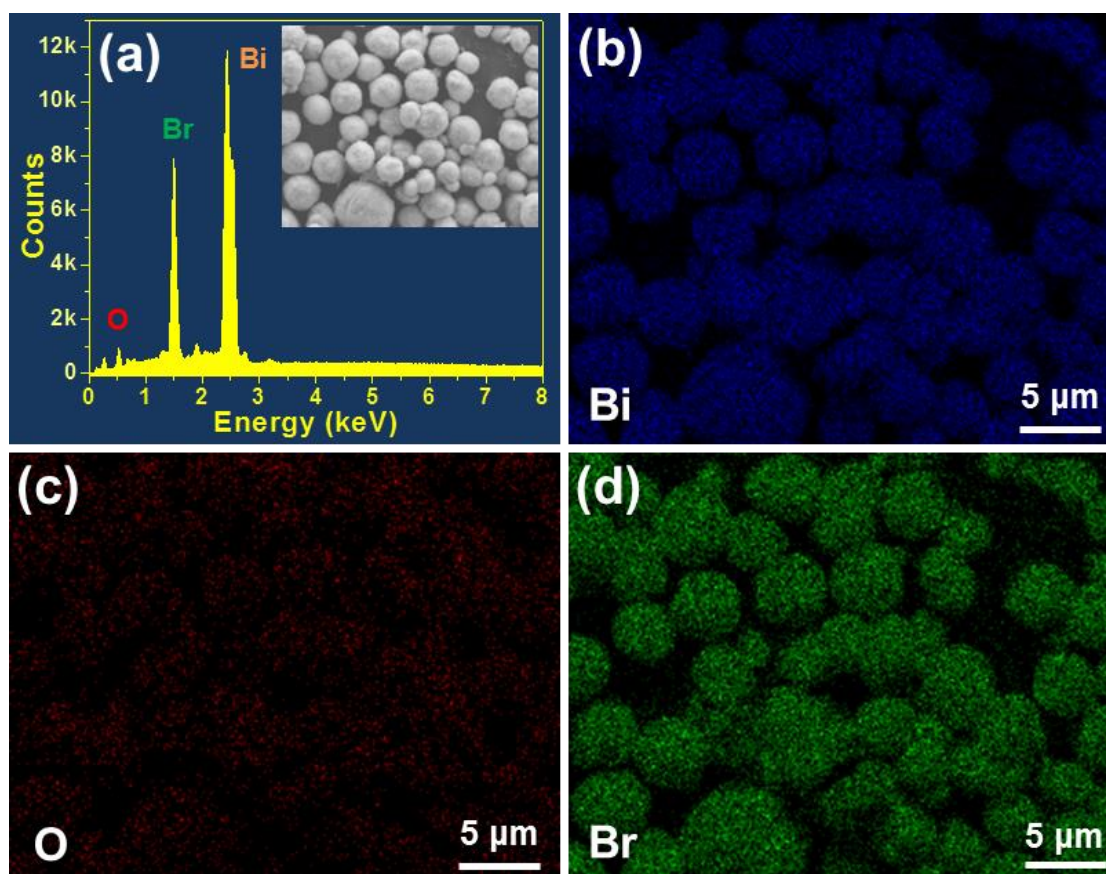

**Figure S2.** (a) EDS spectrum and (b)-(d) Elemental mapping results of BiOBr particles. Inset of (a) shows the FE-SEM image for EDS measurement.

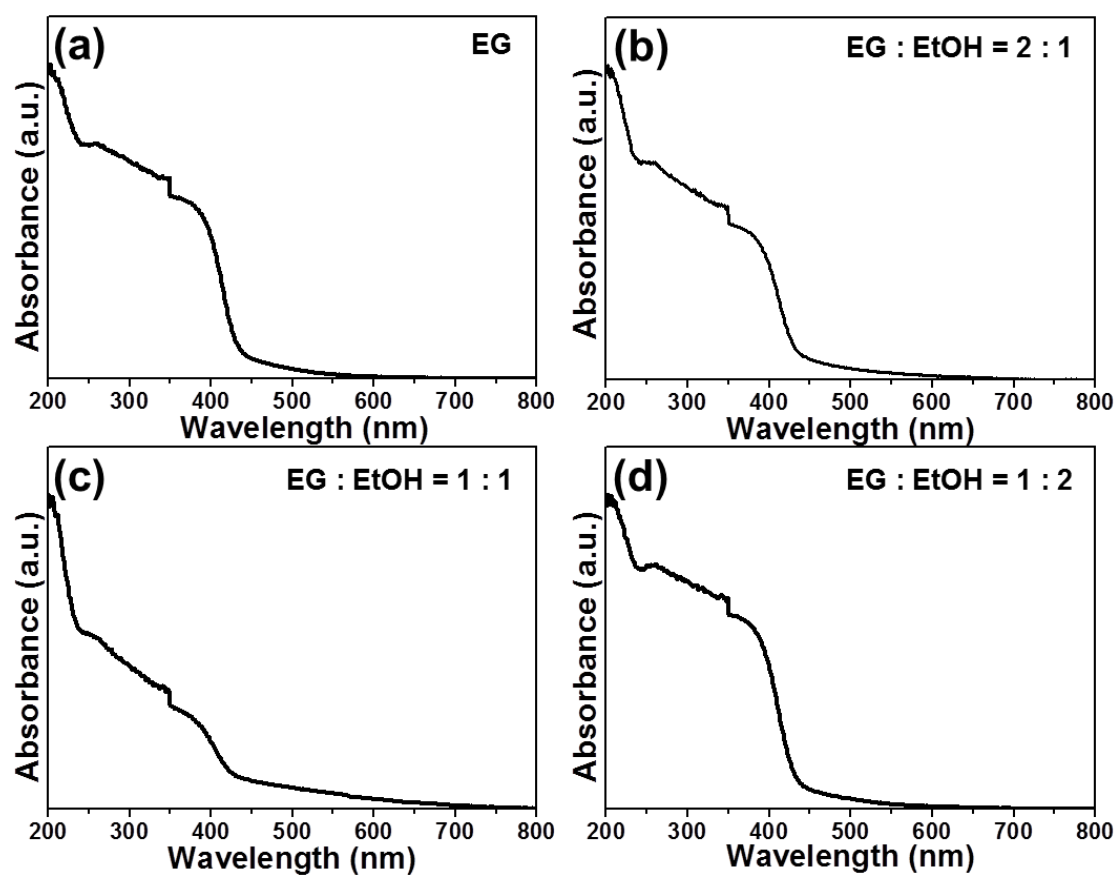

**Figure S3.** UV-vis absorption spectra of BiOBr compounds synthesized by using different solvents of (a) EG, (b) EG:EtOH = 2:1, (c) EG:EtOH = 1:1 and (d) EG:EtOH = 1:2.

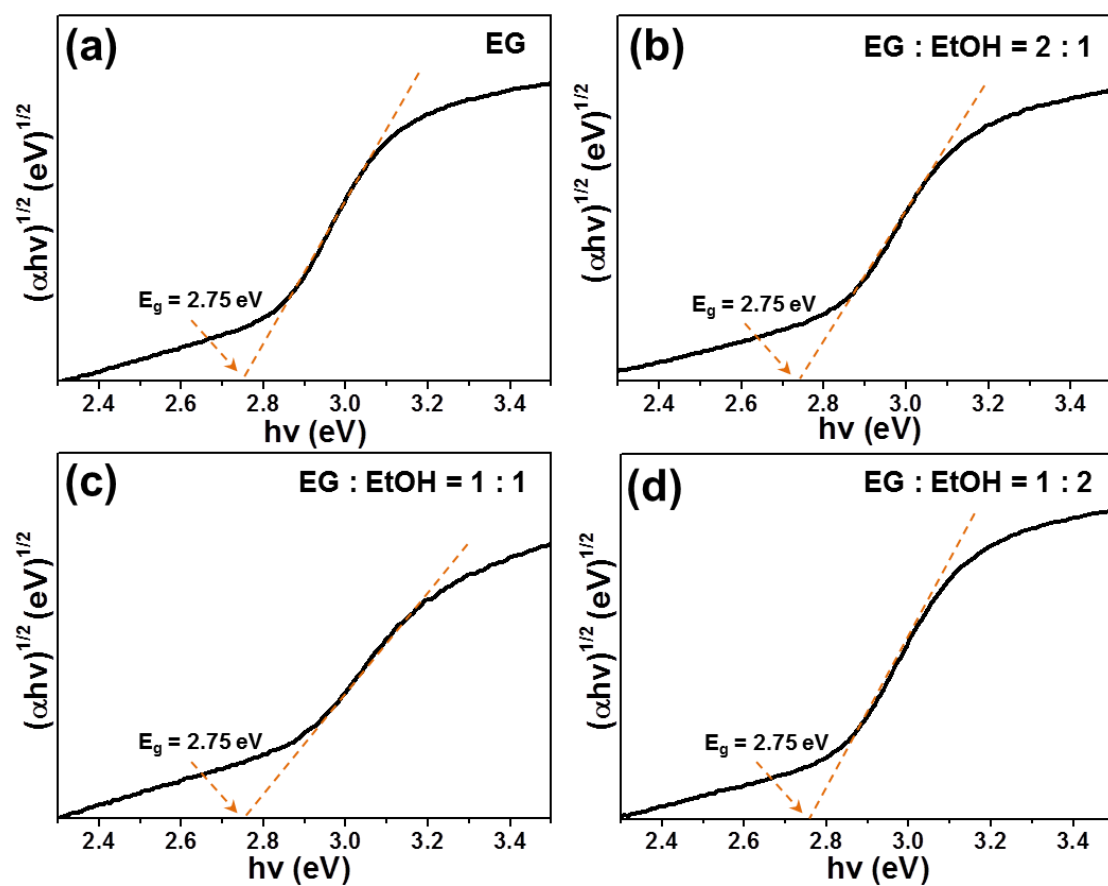

**Figure S4.** Calculated  $E_g$  values of BiOBr compounds, which were synthesized by using different solvents of (a) EG, (b) EG:EtOH = 2:1, (c) EG:EtOH = 1:1 and (d) EG:EtOH = 1:2, based on Kubelka-Munk function.

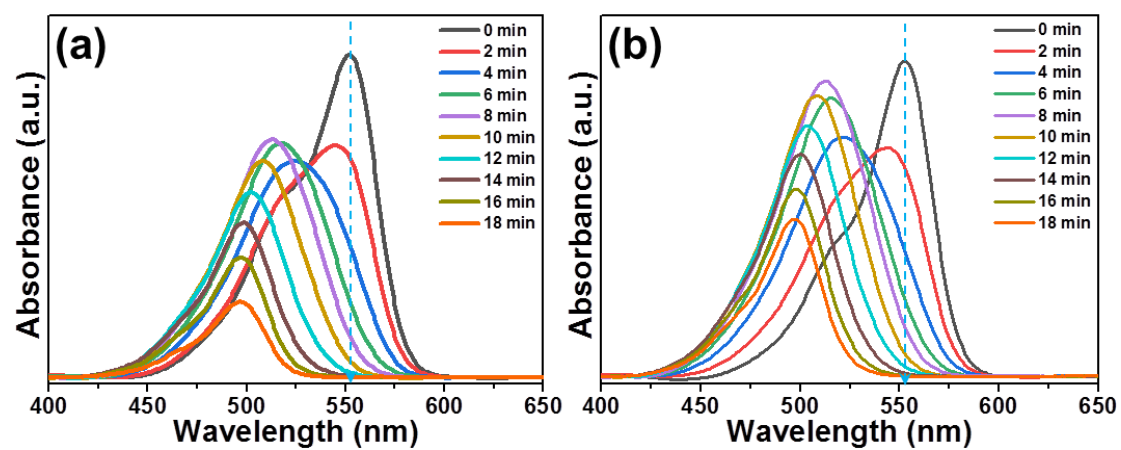

**Figure S5.** UV-vis absorption spectra of RhB photodegradation in the presence of BiOBr particles prepared by diverse solvents of (a) EG:EtOH = 2:1 and (b) EG:EtOH = 1:1.

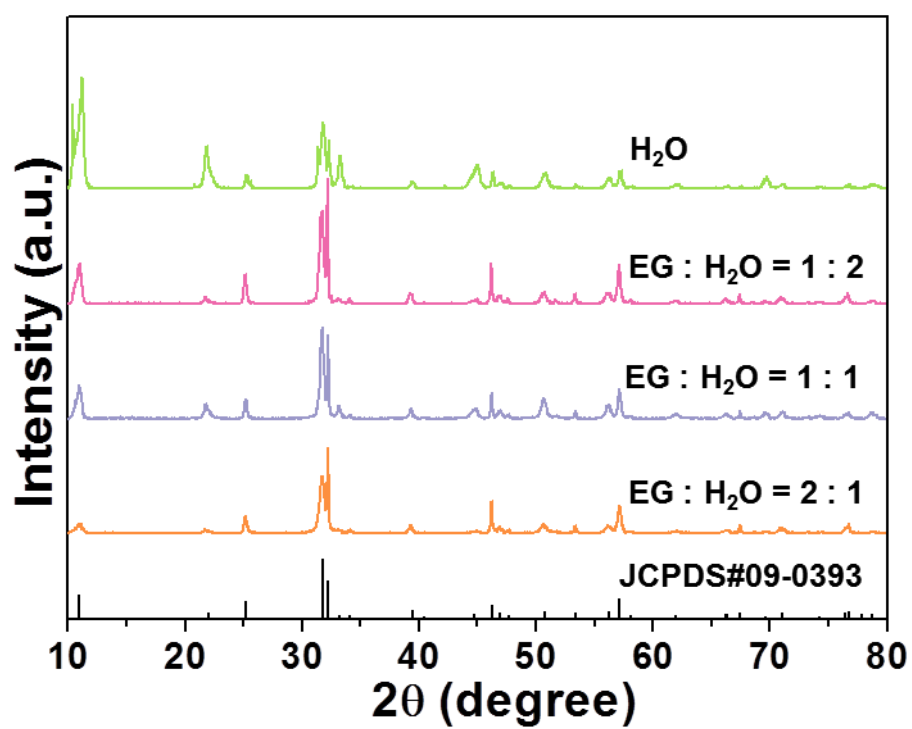

**Figure S6.** XRD patterns of BiOBr particles synthesized by using different ratios of EG and  $\text{H}_2\text{O}$ .

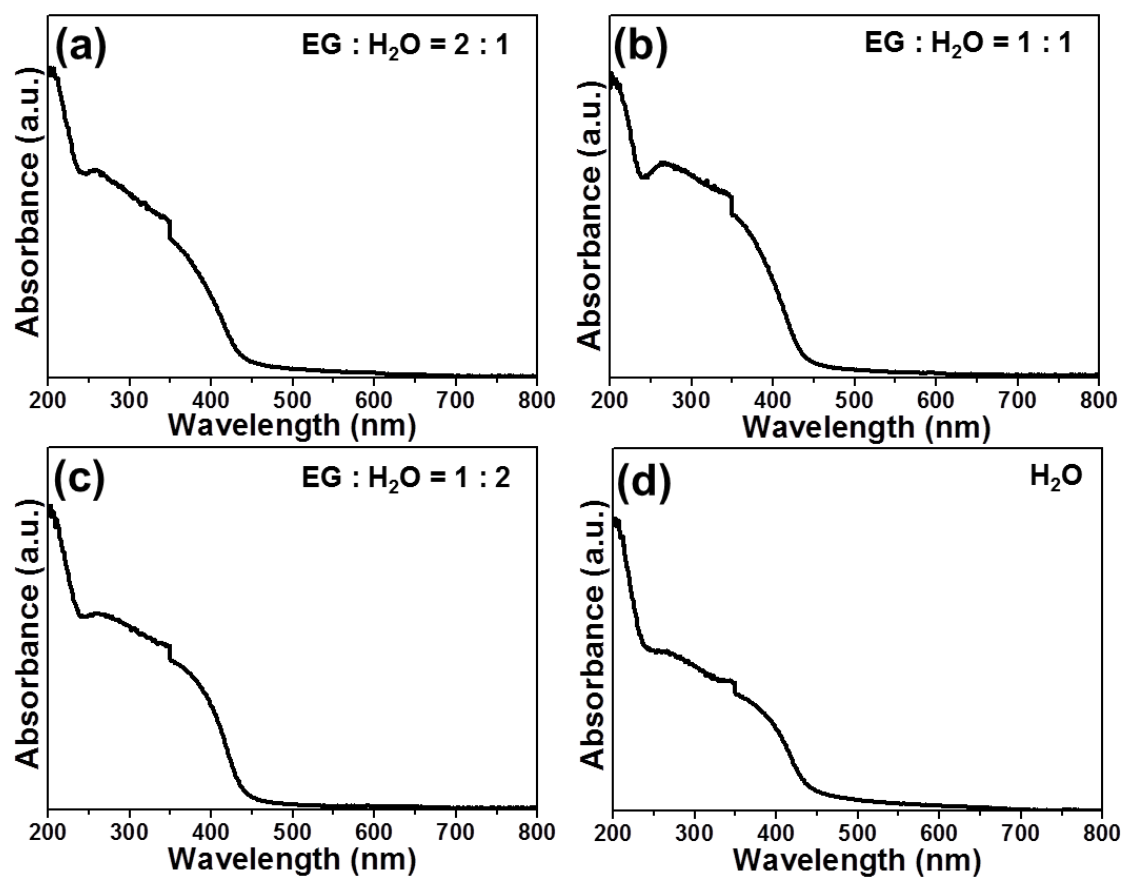

**Figure S7.** UV-vis absorption spectra of BiOBr compounds synthesized by using different solvents of (a) EG:H<sub>2</sub>O = 2:1, (b) EG: H<sub>2</sub>O = 1:1, (c) EG: H<sub>2</sub>O = 1:2 and (d) H<sub>2</sub>O.



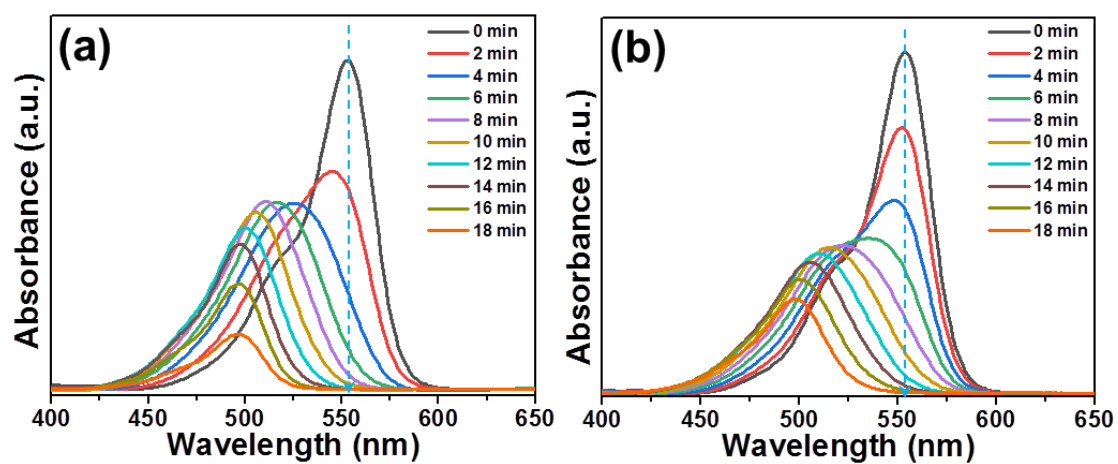

**Figure S8.** UV-vis absorption spectra of RhB photodegradation in the presence of BiOBr particles prepared by diverse solvents of (a) EG:H<sub>2</sub>O = 1:1 and (b) EG:H<sub>2</sub>O = 1:2.

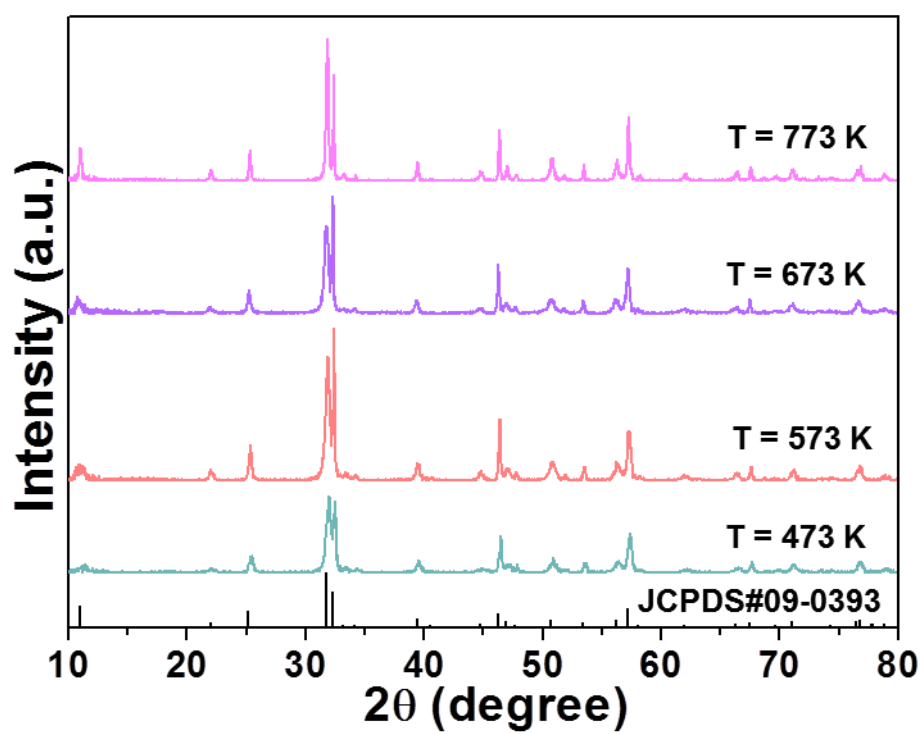

**Figure S9.** XRD patterns of BiOBr particles under various heat treatment temperatures.

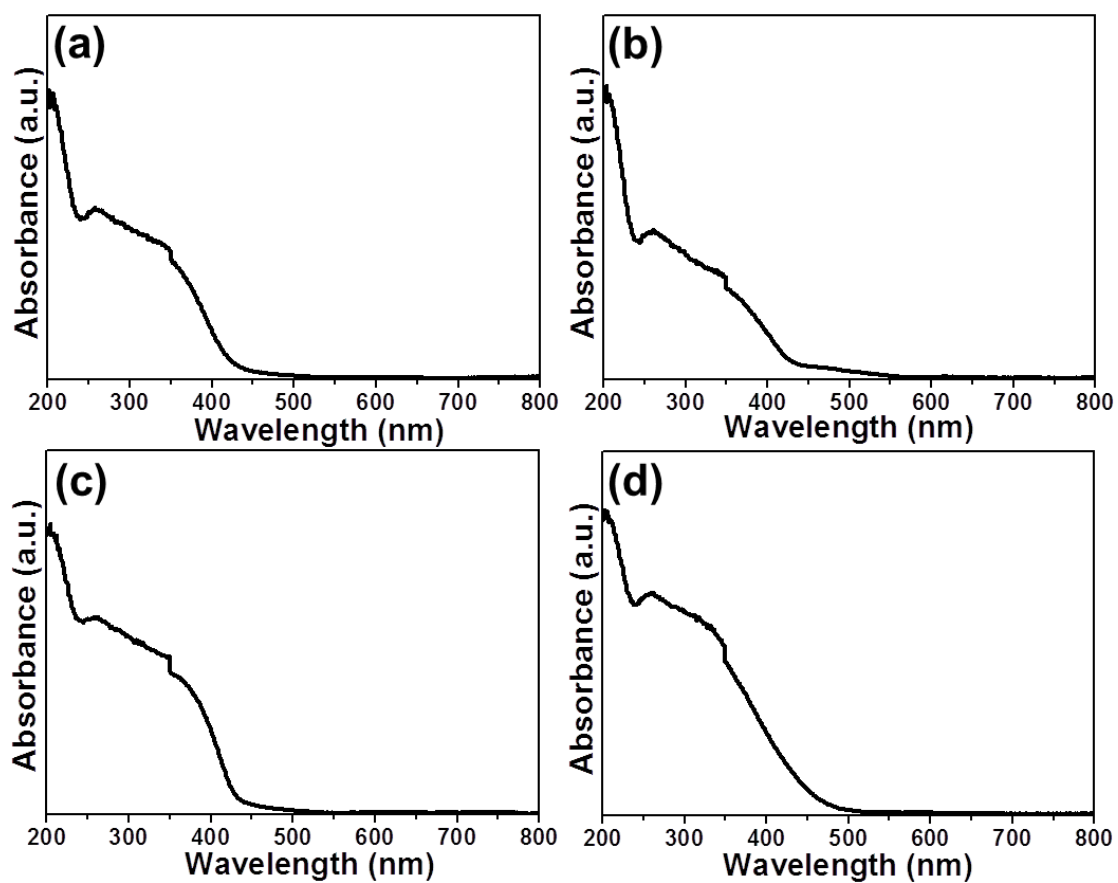

**Figure S10.** UV-vis absorption spectra of BiOBr particles prepared by various heat treatment temperatures of (a)  $T = 473$  K, (b)  $T = 573$  K, (c)  $T = 673$  K and (d)  $T = 773$  K.

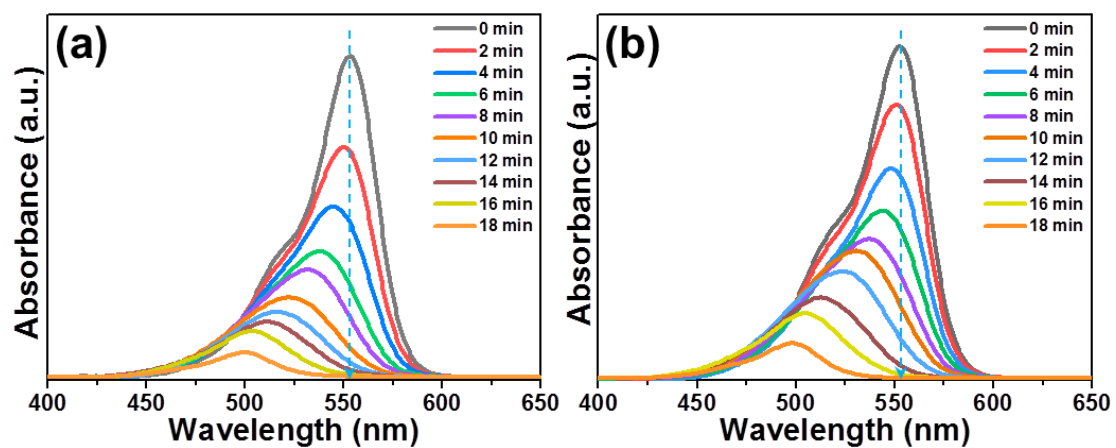

**Figure S11.** UV-vis absorption spectra of RhB photodegradation in the presence of BiOBr particles synthesized by diverse heating temperatures of (a)  $T = 573$  K and (b)  $T = 673$  K.

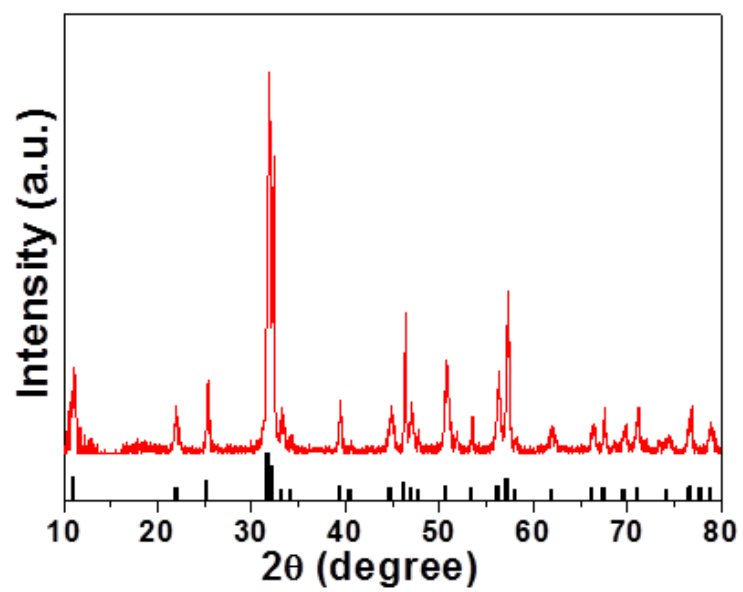

**Figure S12.** XRD pattern of BiOBr particles after the photodegradation process.
